# Supplementary material for: High-performance SrO–Co3O4 nanoparticles anchored on rGO for clean energy: hydrogen generation from formic acid and photocatalytic dye degradation
Source: Royal Society of Chemistry journal article supplement (doi:10.1039/d6ra00101g), 2026-05-29
Supplement: d6ra00101g1.pdf [file d6ra00101g1.pdf]

**High-Performance SrO-Co<sub>3</sub>O<sub>4</sub> Nanoparticles Anchored on rGO for Clean Energy: Hydrogen Generation from Formic Acid and Photocatalytic Dye Degradation**

*Sayyar Ali Shah<sup>a</sup>, Shah Faisal Mohammad<sup>a</sup>, Imtiaz Hussain<sup>b</sup>, Anisa Arif<sup>c</sup>, Muhammad Saad Riaz<sup>c</sup>, Ibrahim A. Shaaban<sup>d</sup>, Akhtar Hayat<sup>e</sup>, Umar Nishan<sup>f</sup>, Hanbing Song<sup>a</sup>, Azhar Abbas<sup>c, g, \*</sup>*

*<sup>a</sup>School of Medical Science, Shandong Xiehe University, Jinan, Shandong Province, P.R.China*

*<sup>b</sup>Department of Chemistry, Superior University Lahore, Lahore 54000, Pakistan*

*<sup>c</sup>Institute of Chemistry, University of Sargodha, Sargodha 40100, Pakistan*

*<sup>d</sup>Department of Chemistry, Faculty of Science, Research Center for Advanced Materials Science (RCAMS), King Khalid University, P.O. Box 960, Abha, 61421, Saudi Arabia*

*<sup>e</sup>Department of Chemical Engineering, Faculty of Engineering, Islamic University of Madinah, Madinah, Saudi Arabia*

*<sup>f</sup>Department of Chemistry, Kohat University of Science and Technology, Kohat 26000 KP Pakistan*

*<sup>g</sup>Government Ambala Muslim Graduate College, Sargodha 40100, Pakistan*

*\* Corresponding author:*

*Dr Azhar Abbas*

*Govt. Ambala Muslim Graduate College, Sargodha, 40100, Pakistan; <https://orcid.org/0000-0002-5741-7136>; Email: [azhar.ramzan@uos.edu.pk](mailto:azhar.ramzan@uos.edu.pk)*

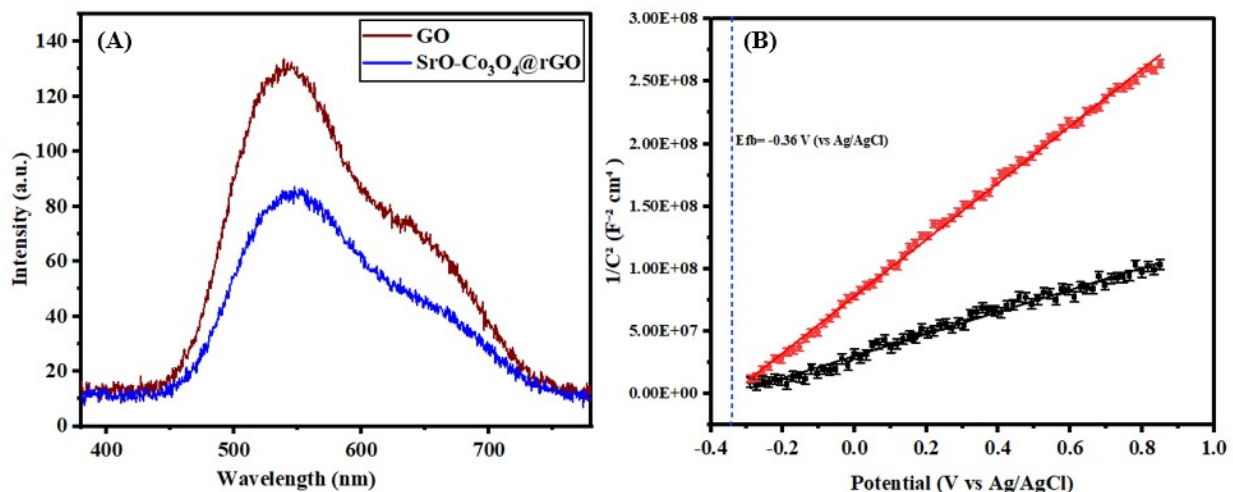

**Fig.S1.** (A) Mott–Schottky plots showing n-type behavior and higher carrier density of SrO-Co<sub>3</sub>O<sub>4</sub>@rGO ( $E_{fb} \approx -0.36$  V vs Ag/AgCl). (B) PL spectra showing reduced emission for SrO-Co<sub>3</sub>O<sub>4</sub>@rGO, indicating suppressed charge recombination.

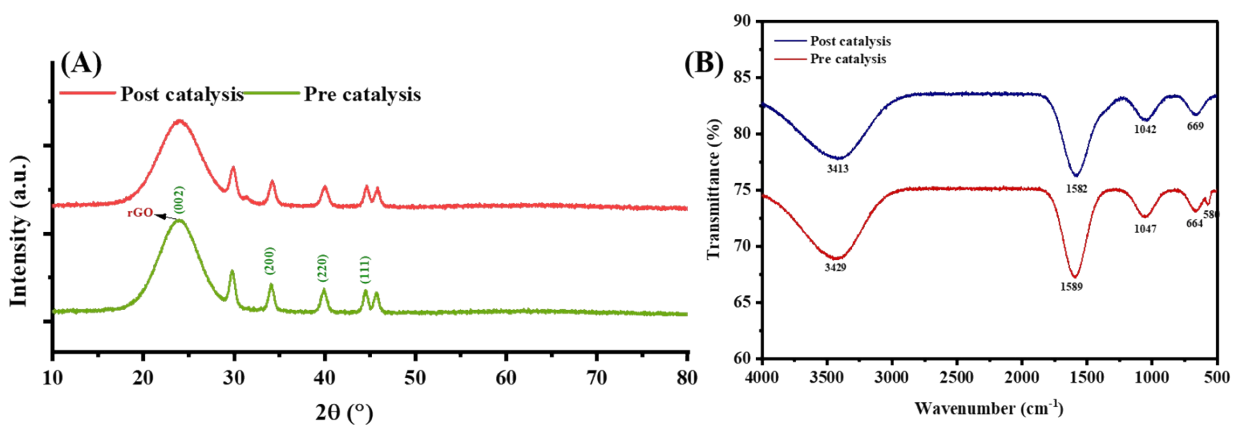

**Fig.S2** (A) Post-catalysis XRD patterns of SrO-Co<sub>3</sub>O<sub>4</sub>@rGO showing preserved crystalline phases of SrO and Co<sub>3</sub>O<sub>4</sub>, indicating structural stability after reaction. (B) Post-catalysis FTIR spectra of SrO-Co<sub>3</sub>O<sub>4</sub>@rGO confirming retention of functional groups and metal-oxygen (M-O) bonding, demonstrating chemical stability of the catalyst.

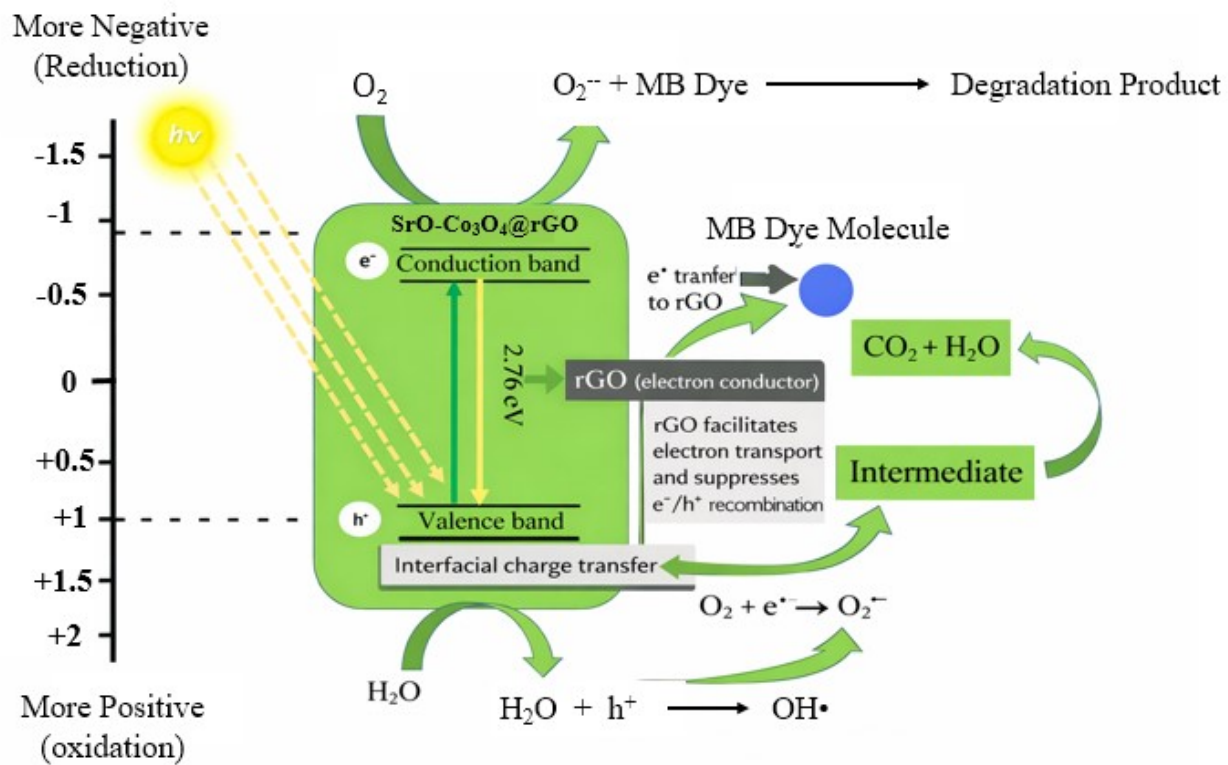

**Fig. S3** Mechanistic illustration of dye degradation using  $\text{SrO-Co}_3\text{O}_4@\text{rGO}$

**Table S1.** Comparison of MB degradation efficiency of SrO-Co<sub>3</sub>O<sub>4</sub>@rGO with recently reported GO/rGO-based photocatalysts.”

| <b>Catalyst</b>                            | <b>Sample</b>                  | <b>Degradation efficiency (%)</b> | <b>Time (min)</b> | <b>Reference</b> |
|--------------------------------------------|--------------------------------|-----------------------------------|-------------------|------------------|
| <b>TiO<sub>2</sub>-PRGO</b>                | MB                             | 100                               | 90                | [75]             |
| <b>GO-ZnO-Ag</b>                           | MB                             | 100                               | 40                | [76]             |
| <b>WN-C-RGO</b>                            | MB under UV Light/<br>Sunlight | 90                                | 120               | [77]             |
| <b>GO-SnO<sub>2</sub></b>                  | MB                             | 89                                | 60                | [78]             |
| <b>MIL-100(Fe)/GO (1M8G)</b>               | MB                             | 95                                | 210               | [79]             |
| <b>GO/ZnO/lignin</b>                       | MB                             | 98                                | 30-60             | [80]             |
| <b>SrO-Co<sub>3</sub>O<sub>4</sub>@rGO</b> | <b>MB</b>                      | <b>96</b>                         | <b>30</b>         | <b>This Work</b> |
